# Supplementary material for: Cuproptosis-Related MiR-21-5p/FDX1 Axis in Clear Cell Renal Cell Carcinoma and Its Potential Impact on Tumor Microenvironment
Source: MDPI journal article supplement (doi:10.3390/cells12010173), 2022-12-31
Supplement: s1 [file s1]

**Table S1. The clinicopathological characteristics of ccRCC patients in micro-array**

| Patient ID | Gender | Age | Tumor size (cm) | Stage | Grade | Survival time(m) | Adjacent tissue |
|------------|--------|-----|-----------------|-------|-------|------------------|-----------------|
| 1#         | male   | 79  | 5               | T1b   | 2     | 87               | Yes*            |
| 2#         | male   | 62  | 10x5x4          | T2b   | 3     | 86               | Yes*            |
| 3#         | female | 42  | 3               | T1a   | 1     | 85               | Yes*            |
| 4#         | male   | 52  | 2.5x2x2         | T1a   | 2     | 84               | Yes*            |
| 5#         | male   | 66  | 5.5x4.5x4       | T1b   | 3     | 83               | Yes*            |
| 6#         | male   | 78  | 4x4x4.5         | T1b   | 3     | 80               | Yes*            |
| 7#         | female | 47  | 2.6x2.5x1.5     | T1a   | 3     | 87               | Yes*            |
| 8#         | male   | 30  | 5               | T1b   | 2     | 87               | Yes*            |
| 9#         | male   | 49  | 3.2x2.5x2.2     | T1a   | 2     | 86               | Yes*            |
| 10#        | male   | 46  | 2.6X3.2X3.7     | T1a   | 1     | 84               | Yes*            |
| 11#        | male   | 49  | 3x3x2.5         | T1a   | 2     | 81               | Yes             |
| 12#        | female | 75  | 4               | T1a   | 2     | 79               | Yes             |
| 13#        | female | 48  | 4.8x4x4         | T2a   | 3     | 79               | Yes             |
| 14#        | male   | 43  | 3.5             | T1a   | 1     | 77               | Yes             |
| 15#        | female | 56  | 4.2X5.2X7.2     | T3a   | 3     | 77               | Yes             |
| 16#        | male   | 57  | 3               | T2a   | 1     | 75               | Yes             |
| 17#        | female | 51  | 3x2x1.4         | T1a   | 2     | 75               | Yes             |
| 18#        | male   | 63  | 7.5x7x5.5       | T2a   | 3     | 75               | Yes             |
| 19#        | male   | 58  | 4               | T3a   | 3     | 73               | Yes             |
| 20#        | male   | 63  | 8x8x7           | T2a   | 2     | 72               | Yes             |
| 21#        | male   | 65  | 6x4.5x4         | T2b   | 3     | 68               | Yes             |
| 22#        | female | 55  | 10x7x6          | T2b   | 3     | 67               | Yes             |
| 23#        | male   | 53  | 2.2x2.2         | T1a   | 1     | 66               | Yes             |
| 24#        | male   | 51  | 5x4.5x4         | T3a   | 3     | 66               | Yes             |
| 25#        | female | 53  | 3               | T1a   | 1     | 66               | Yes             |
| 26#        | male   | 65  | 4               | T1a   | 2     | 64               | Yes             |
| 27#        | female | 31  | 3x2.5x2         | T1a   | 1     | 63               | Yes             |
| 28#        | male   | 59  | 3x3x1.2         | T1a   | 1     | 62               | NO              |
| 29#        | female | 41  | 3.5x3x2.5       | T1a   | 1     | 62               | NO              |
| 30#        | male   | 57  | 3.5x3.5x3.3     | T1a   | 1     | 62               | NO              |
| 31#        | female | 72  | 2.5             | T1a   | 1     | 62               | NO              |
| 32#        | female | 64  | 4x3x2.5         | T1a   | 1     | 62               | NO              |
| 33#        | male   | 75  | 7.5x6.5x5       | T2a   | 3     | 61               | NO              |
| 34#        | male   | 57  | 5x5x3           | T1b   | 1     | 61               | NO              |
| 35#        | female | 68  | 7x6.5x5         | T1b   | 1     |                  | NO              |
| 36#        | female | 39  | 10x10x5         | T2a   | 3     |                  | NO              |
| 37#        | male   | 71  | 5x4.2x4         | T1b   | 3     |                  | NO              |
| 38#        | male   | 76  | 5x4.5x2.5       | T1b   | 2     |                  | NO              |
| 39#        | female | 62  | 6.3             | T1b   | 2     |                  | NO              |

|     |        |    |             |     |   |    |
|-----|--------|----|-------------|-----|---|----|
| 40# | female | 51 | 5x4x2.5     | T1b | 3 | NO |
| 41# | female | 50 | 2x1.5x1     | T1b | 2 | NO |
| 42# | male   | 51 | 4.5x4x3.5   | T1b | 1 | NO |
| 43# | male   | 68 | 5x3.5       | T1b | 2 | NO |
| 44# | male   | 65 | 6x6x4.5     | T1b | 2 | NO |
| 45# | male   | 45 | 9           | T3a | 3 | NO |
| 46# | male   | 64 | 6.5x5x5     | T3a | 1 | NO |
| 47# | male   | 70 | 7x5x5       | T1b | 2 | NO |
| 48# | female | 77 | 7x6.5x5.5   | T1b | 3 | NO |
| 49# | male   | 68 | 4x4x3       | T1a | 2 | NO |
| 50# | male   | 60 | 6x5x4       | T1b | 3 | NO |
| 51# | male   | 68 | 4           | T1a | 3 | NO |
| 52# | male   | 55 | 4.5X3.6     |     |   | NO |
| 53# | male   | 72 | 7.2X6.3X5.5 |     |   | NO |
| 54# | female | 74 | 6.6         |     |   | NO |
| 55# | male   | 47 | 4.3X4.9     |     |   | NO |
| 56# | male   | 46 | 4.3X6.4X7.2 |     |   | NO |
| 57# | male   | 64 | 3.4X4.9X6.2 |     |   | NO |
| 58# | female | 68 | 5.5         |     |   | NO |
| 59# | male   | 65 | 5.4X3.5X6.2 |     |   | NO |
| 60# | female | 73 | 5X3.5X4.5   |     |   | NO |
| 61# | female | 68 | 6.8X7X5     |     |   | NO |
| 62# | male   | 46 | 5X4.4       |     |   | NO |

Notes: \*marked ccRCC patient as well as its adjacent kidney tissue was used for western blotting analysis in Figure 4A.

**Table S2. The associations between the expression levels of cuproptosis regulators and the clinicopathological characteristics of ccRCC in TCGA-KIRC**

| genes     | FDX1   | LIAS   | LIPT1  | DLD    | DLAT    | PDHB   | MTF1    | GLS    | CDKN2A  | PDHA1  |
|-----------|--------|--------|--------|--------|---------|--------|---------|--------|---------|--------|
| alive     | 10.44  | 9.54   | 8.00   | 12.31  | 11.07   | 10.82  | 10.29   | 13.57  | 7.98    | 4.05   |
| dead      | 10.25  | 9.42   | 7.97   | 12.07  | 10.65   | 10.71  | 9.99    | 13.51  | 8.31    | 4.02   |
| P value   | 0.0003 | 0.0603 | 0.4816 | 0.0004 | <0.0001 | 0.0084 | <0.0001 | 0.0928 | 0.0095  | 0.3062 |
| P. symbol | ***    | ns     | ns     | ***    | ****    | **     | ****    | ns     | **      | ns     |
| <=30      | 10.76  | 9.08   | 7.58   | 11.94  | 10.78   | 11.13  | 10.16   | 12.94  | 7.75    | 4.09   |
| 30-60     | 10.37  | 9.50   | 7.98   | 12.22  | 10.95   | 10.80  | 10.20   | 13.53  | 8.00    | 4.03   |
| >=60      | 10.38  | 9.50   | 8.01   | 12.24  | 10.91   | 10.77  | 10.19   | 13.56  | 8.17    | 4.05   |
| P value   | 0.6978 | 0.6403 | 0.5312 | 0.864  | 0.8744  | 0.621  | 0.9943  | 0.528  | 0.2243  | 0.9287 |
| P. symbol | ns     | ns     | ns     | ns     | ns      | ns     | ns      | ns     | ns      | ns     |
| female    | 10.45  | 9.47   | 8.00   | 12.28  | 11.00   | 10.83  | 10.29   | 13.74  | 8.19    | 4.07   |
| male      | 10.34  | 9.51   | 7.99   | 12.21  | 10.90   | 10.76  | 10.15   | 13.45  | 8.04    | 4.02   |
| P value   | 0.1633 | 0.3121 | 0.8098 | 0.4744 | 0.2     | 0.334  | 0.0668  | 0.0027 | 0.401   | 0.1577 |
| P. symbol | ns     | ns     | ns     | ns     | ns      | ns     | ns      | **     | ns      | ns     |
| 1         | 9.99   | 9.46   | 7.64   | 11.92  | 10.94   | 10.60  | 10.42   | 13.39  | 8.01    | 3.91   |
| 2         | 10.43  | 9.58   | 8.04   | 12.28  | 11.04   | 10.81  | 10.30   | 13.51  | 7.78    | 4.04   |
| 3         | 10.37  | 9.49   | 7.99   | 12.23  | 10.91   | 10.78  | 10.11   | 13.60  | 8.25    | 4.06   |
| 4         | 10.27  | 9.27   | 7.89   | 12.12  | 10.68   | 10.76  | 10.08   | 13.53  | 8.57    | 4.00   |
| P value   | 0.0681 | 0.0036 | 0.0502 | 0.3155 | 0.0369  | 0.7063 | 0.057   | 0.6245 | <0.0001 | 0.5711 |
| P. symbol | ns     | **     | ns     | ns     | *       | ns     | ns      | ns     | ****    | ns     |
| 1         | 10.47  | 9.61   | 8.02   | 12.37  | 11.12   | 10.89  | 10.36   | 13.60  | 7.94    | 4.07   |
| 2         | 10.27  | 9.55   | 8.09   | 12.16  | 10.94   | 10.73  | 10.02   | 13.44  | 8.02    | 4.08   |
| 3         | 10.33  | 9.35   | 7.94   | 12.06  | 10.69   | 10.63  | 10.03   | 13.49  | 8.28    | 3.98   |
| 4         | 10.25  | 9.35   | 7.92   | 12.13  | 10.71   | 10.75  | 10.06   | 13.54  | 8.29    | 4.03   |
| P value   | 0.019  | 0.0001 | 0.2302 | 0.0035 | <0.0001 | 0.0018 | 0.0003  | 0.5252 | 0.0153  | 0.2323 |
| P. symbol | *      | ***    | ns     | **     | ****    | **     | ***     | ns     | *       | ns     |
| 1         | 10.46  | 9.61   | 8.03   | 12.37  | 11.12   | 10.89  | 10.36   | 13.60  | 7.96    | 4.07   |
| 2         | 10.25  | 9.51   | 8.04   | 12.10  | 10.83   | 10.72  | 9.94    | 13.47  | 8.07    | 4.07   |
| 3         | 10.31  | 9.33   | 7.93   | 12.08  | 10.70   | 10.65  | 10.05   | 13.50  | 8.22    | 3.98   |
| 4         | 10.24  | 9.49   | 7.87   | 12.31  | 11.01   | 10.99  | 10.28   | 13.46  | 9.08    | 4.13   |
| P value   | 0.0273 | 0.0001 | 0.2362 | 0.0027 | <0.0001 | 0.0008 | 0.0001  | 0.5417 | 0.0027  | 0.1993 |
| P. symbol | *      | ***    | ns     | **     | ****    | ***    | ***     | ns     | **      | ns     |
| no        | 10.40  | 9.52   | 8.01   | 12.25  | 10.98   | 10.80  | 10.22   | 13.55  | 8.08    | 4.05   |
| yes       | 10.23  | 9.35   | 7.92   | 12.12  | 10.69   | 10.72  | 10.05   | 13.55  | 8.15    | 4.01   |
| P value   | 0.0279 | 0.0227 | 0.2009 | 0.1246 | 0.0018  | 0.0916 | 0.0357  | 0.9718 | 0.2921  | 0.2023 |
| P. symbol | *      | *      | ns     | ns     | **      | ns     | *       | ns     | ns      | ns     |
| no        | 10.40  | 9.53   | 8.00   | 12.29  | 10.95   | 10.82  | 10.21   | 13.60  | 8.07    | 4.04   |
| yes       | 10.07  | 9.14   | 7.87   | 12.11  | 10.55   | 10.66  | 10.07   | 13.49  | 8.07    | 4.00   |
| unknown   | 10.37  | 9.49   | 7.99   | 12.18  | 10.93   | 10.76  | 10.19   | 13.50  | 8.11    | 4.04   |
| P value   | 0.1587 | 0.0665 | 0.7219 | 0.2942 | 0.2685  | 0.4786 | 0.8354  | 0.4063 | 0.9314  | 0.9549 |
| P. symbol | ns     | ns     | ns     | ns     | ns      | ns     | ns      | ns     | ns      | ns     |

Supplementary Figure S1

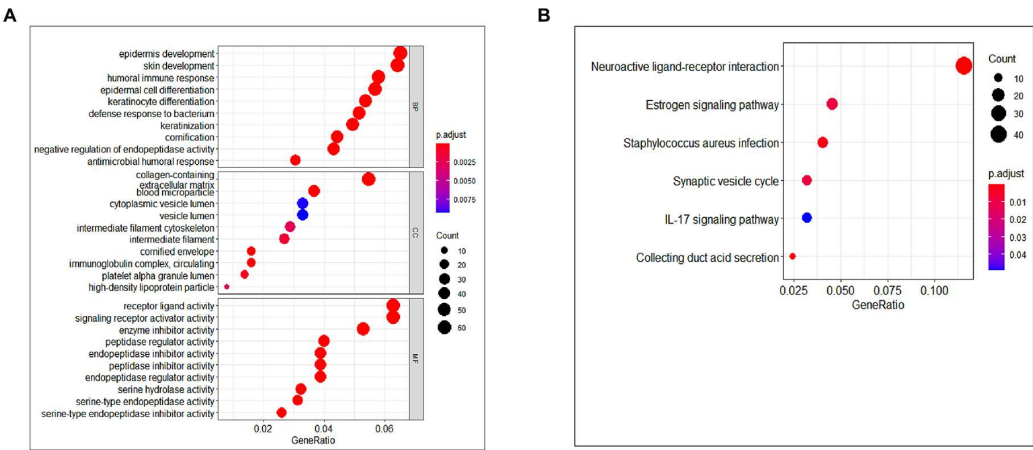

Figure S1: GO and KEGG analyses of CSS and CRS. **(A)** GO analysis of the differentially expressed genes (DEGs) between CSS and CRS. **(B)** KEGG analysis of differentially expressed genes (DEGs) between CSS and CRS.

Supplementary Figure S2

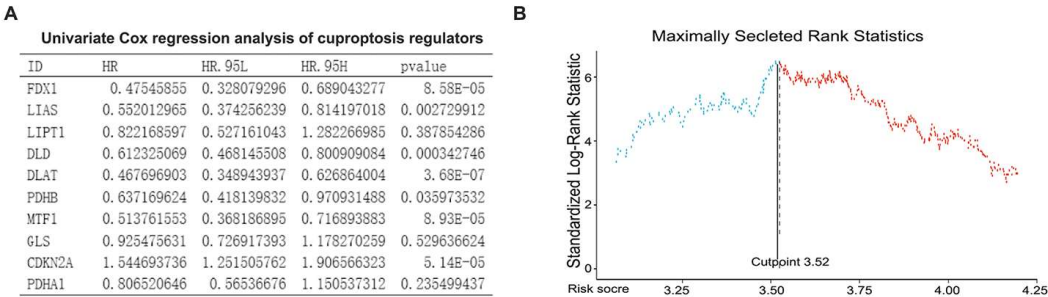

Figure S2: Univariate Cox regression analysis and cutoff point of risk score. **(A)** Univariate Cox regression analysis of the cuproptosis related regulators. **(B)** Cuproptosis risk score selection based on the analysis from the survcutpoint in the survminer R package.
